# Supplementary material for: 16S rRNA metagenomic analysis of the bacterial community associated with turf grass seeds from low moisture and high moisture climates
Source: PeerJ. 2020 Jan 10;8:e8417. doi: 10.7717/peerj.8417 (PMC6956778; doi:10.7717/peerj.8417)
Supplement: Supplemental Information 1 — For each seed sample, sample number, species, variety, production year, production location, and the annual rainfall are reported. [file peerj-08-8417-s001.xlsx]

## Sheet: Supplementary_Data_S1
Sample Number	Species	Variety	Year	Location	Annual Rainfall (mm)
V01	Festuca rubra	Caldri	2011	Store Hedinge, Denmark	799.08
V02	Festuca rubra	Blenheim	2011	Store Hedinge, Denmark	799.08
V03	Festuca rubra	FRC 1310	2011	Store Hedinge, Denmark	799.08
V04	Festuca rubra	Troville	2011	Store Hedinge, Denmark	799.08
V05	Festuca rubra	Beudin	2011	Store Hedinge, Denmark	799.08
V06	Festuca rubra	Cezanne	2011	Store Hedinge, Denmark	799.08
V07	Lolium arundinacea	Braveheart	2011	Store Hedinge, Denmark	799.08
V08	Lolium arundinacea	Greenbrooks	2011	Store Hedinge, Denmark	799.08
V09	Lolium perenne	Mercitwo	2014	Store Hedinge, Denmark	850.39
V10	Lolium perenne	Bizet 1	2014	Store Hedinge, Denmark	850.39
V11	Lolium perenne	Galleon	2015	Store Hedinge, Denmark	738.38
V12	Lolium perenne	Clementine	2013	Store Hedinge, Denmark	550.93
V13	Lolium perenne	Melbourne	2014	Store Hedinge, Denmark	850.39
V14	Lolium perenne	Chardin	2011	Store Hedinge, Denmark	799.08
V15	Lolium perenne	Fabian	2014	Store Hedinge, Denmark	850.39
V16	Lolium perenne	Chardin	2014	Store Hedinge, Denmark	850.39
V17	Lolium perenne	Columbine	2011	Store Hedinge, Denmark	799.08
V18	Lolium perenne	Tetragreen	2014	Les Alleuds, France	786.38
V19	Lolium perenne	DLF LPG 3022	2011	Store Hedinge, Denmark	799.08
V20	Lolium perenne	Fabian	2013	Les Alleuds, France	786.64
V21	Lolium perenne	Tetratop	2015	Les Alleuds, France	633.48
V22	Lolium perenne	Tetradry	2013	Les Alleuds, France	786.64
V23	Lolium perenne	Tetrastar	2014	Les Alleuds, France	786.38
V24	Lolium perenne	Tetragreen	2011	Les Alleuds, France	587.5
V25	Lolium perenne	Essence	2012	Store Hedinge, Denmark	636.02
V26	Lolium perenne	Hamlet HZ 2NF1	2012	Store Hedinge, Denmark	636.02
V27	Lolium perenne	Berlioz 1	2011	Store Hedinge, Denmark	799.08
