# Supplementary material for: 16S rRNA metagenomic analysis of the bacterial community associated with turf grass seeds from low moisture and high moisture climates
Source: PeerJ. 2020 Jan 10;8:e8417. doi: 10.7717/peerj.8417 (PMC6956778; doi:10.7717/peerj.8417)
Supplement: Supplemental Information 3 — Climate, species, and genus were listed in separate worksheet. [file peerj-08-8417-s003.xlsx]

## Sheet: Climate
Group 1	Group 2	H	p-value	q-value
LM (n=4)	HM (n=19)	7.60526	0.00581982	0.00581982

## Sheet: Species
Group 1	Group 2	H	p-value	q-value
Festuca rubra (n=6)	Lolium arundinacea (n=2)	0.111111	0.738883	0.738883
Festuca rubra (n=6)	Lolium perenne (n=15)	2.18788	0.139101	0.417302
Lolium arundinacea (n=2)	Lolium perenne (n=15)	1.08889	0.296718	0.445076

## Sheet: Genus
Group 1	Group 2	H	p-value	q-value
Festuca (n=6)	Lolium (n=17)	1.58824	0.207578	0.207578
