# Supplementary material for: 16S rRNA metagenomic analysis of the bacterial community associated with turf grass seeds from low moisture and high moisture climates
Source: PeerJ. 2020 Jan 10;8:e8417. doi: 10.7717/peerj.8417 (PMC6956778; doi:10.7717/peerj.8417)
Supplement: Supplemental Information 4 — Climate, species, and genus were listed in separate worksheet. [file peerj-08-8417-s004.xlsx]

## Sheet: Climate
Group 1	Group 2	Sample size	Permutations	pseudo-F	p-value	q-value
LM	HM	23	999	2.71868	0.002	0.002

## Sheet: Species
Group 1	Group 2	Sample size	Permutations	pseudo-F	p-value	q-value
Festuca rubra	Lolium arundinacea	8	999	1.37785	0.101	0.1635
Festuca rubra	Lolium perenne	21	999	1.52207	0.109	0.1635
Lolium arundinacea	Lolium perenne	17	999	1.54914	0.204	0.204

## Sheet: Genus
Group 1	Group 2	Sample size	Permutations	pseudo-F	p-value	q-value
Festuca	Lolium	23	999	1.321	0.18	0.18
